# Supplementary material for: Whole-Genome-Based Public Health Surveillance of Less Common Shiga Toxin-Producing Escherichia coli Serovars and Untypeable Strains Identifies Four Novel O Genotypes
Source: PubMed Central journal article supplement (PMC6760944; doi:10.1128/jcm.00768-19), 2019-09-24
Supplement: JCM.00768-19-s0001.pdf [file JCM.00768-19-s0001.pdf]

**Table S1: Overview of strains used in the study (Lang et al., Whole genome-based public health surveillance of less common STEC serovars and untypable strains identifies four novel O genotypes).**

Abbreviations of phenotypic resistances: ampicillin (AMP), ciprofloxacin (CIP), chloramphenicol (CMP), cefoxitin (COX), cefotiam (CTM), cefotaxime (CTX), gentamicin (GEN), kanamycin (KAN), mezlocillin (MEZ), mezlocillin/sulbactam (MSU), nalidixic acid (NAL), oxytetracycline (OTE), streptomycin (STR), sulfamethoxazole/trimethoprim (SXT)

The sequences were uploaded to the European Nucleotide Archive under the study Acc. No. PRJEB32361.

| RKI No.    | Phenotypic O group | Phenotypic H type | WGS derived O group | WGS derived H type | MILST | Accession No.             | PCR-based stx1 | WGS-derived stx1 | WGS-derived stx1 subtype | PCR-based stx2 | WGS-derived stx2 | WGS-derived stx2 subtype | PCR-based eaeA | WGS-derived eaeA | Phenotypic resistance profile                          |
|------------|--------------------|-------------------|---------------------|--------------------|-------|---------------------------|----------------|------------------|--------------------------|----------------|------------------|--------------------------|----------------|------------------|--------------------------------------------------------|
| 15-02245   | 117                | 7                 | 117                 | 7                  | 5292  | ERS3396047 (SAMEA5591832) | +              | +                | stx1a                    | -              | -                | -                        | -              | -                | AMP; MEZ; OTE; SXT; STR; NAL;                          |
| 15-02364   | 178                | 7                 | 153/178             | 7                  | 278   | ERS3396048 (SAMEA5591833) | +              | +                | stx1c                    | +              | +                | stx2b                    | -              | -                | susceptible                                            |
| 15-02506   | 79                 | 14                | 79                  | 14                 | 1249  | ERS3396049 (SAMEA5591834) | -              | -                | -                        | +              | +                | stx2b                    | -              | -                | susceptible                                            |
| 15-02583   | 183                | 18                | 183                 | 18                 | 657   | ERS3396050 (SAMEA5591835) | +              | +                | stx1a                    | -              | -                | -                        | -              | -                | susceptible                                            |
| 15-02585   | 136                | 16                | 136                 | 16                 | 329   | ERS3396051 (SAMEA5591836) | +              | +                | stx1a                    | -              | -                | -                        | -              | -                | susceptible                                            |
| 15-02590   | nt                 | 2                 | 80                  | 2                  | 301   | ERS3396052 (SAMEA5591837) | -              | -                | -                        | +              | +                | stx2a                    | +              | +                | AMP; CMP; KAN; MEZ; OTE; SXT; STR; NAL;                |
| 15-02594   | 154                | 31                | 154                 | 31                 | 1892  | ERS3396053 (SAMEA5591838) | +              | +                | stx1d                    | -              | -                | -                        | -              | -                | susceptible                                            |
| 15-02596   | 55                 | 12                | 55                  | 12                 | 101   | ERS3396054 (SAMEA5591839) | +              | +                | stx1a                    | -              | -                | -                        | -              | -                | OTE;                                                   |
| 15-02618   | 45                 | 2                 | 45                  | 2                  | 301   | ERS3396055 (SAMEA5591840) | -              | -                | -                        | +              | +                | stx2a                    | +              | +                | AMP; CMP; KAN; MEZ; OTE; STR; NAL;                     |
| 15-03173   | 55                 | 12                | 55                  | 12                 | 101   | ERS3396056 (SAMEA5591841) | +              | +                | stx1a                    | -              | -                | -                        | -              | -                | AMP; CMP; MEZ; SXT; STR;                               |
| 15-03191   | nt                 | 2                 | 80                  | 2                  | 301   | ERS3396057 (SAMEA5591842) | -              | -                | -                        | +              | +                | stx2a                    | +              | +                | AMP; CMP; CTM; CTX; GEN; KAN; MEZ; MSU; SXT; STR; NAL; |
| 15-03416   | nt                 | 2                 | 80                  | 2                  | 301   | ERS3396058 (SAMEA5591843) | -              | -                | -                        | +              | +                | stx2a                    | +              | +                | AMP; CMP; GEN; KAN; MEZ; OTE; SXT; STR; NAL;           |
| 15-03726   | 55                 | 12                | 55                  | 12                 | 101   | ERS3396059 (SAMEA5591844) | +              | +                | stx1a                    | -              | -                | -                        | -              | -                | AMP; CTM; CTX; GEN; MEZ; MSU; STR;                     |
| 15-03820   | nt                 | 15                | 23                  | 15                 | 70    | ERS3396060 (SAMEA5591845) | -              | -                | -                        | +              | +                | stx2a                    | -              | -                | AMP; OTE;                                              |
| 15-03886   | nt                 | 30                | 27                  | 30                 | 753   | ERS3396061 (SAMEA5591846) | -              | -                | -                        | +              | +                | stx2b                    | -              | -                | susceptible                                            |
| 15-04038   | 8                  | nm                | 8                   | 19                 | 201   | ERS3396062 (SAMEA5591847) | -              | -                | -                        | +              | +                | stx2e                    | -              | -                | AMP; CTM; CTX; MEZ; OTE; SXT; STR;                     |
| 15-04130   | nt                 | 30                | 27                  | 30                 | 753   | ERS3396063 (SAMEA5591848) | -              | -                | -                        | +              | +                | stx2b                    | -              | -                | susceptible                                            |
| 15-04152   | 26                 | 11                | 26                  | 11                 | 29    | ERS3396064 (SAMEA5591849) | -              | -                | -                        | +              | +                | stx2a                    | +              | +                | AMP; CTM; CTX; GEN; MEZ; MSU;                          |
| 15-04442   | nt                 | 8                 | OgN1                | 8                  | 26    | ERS3396065 (SAMEA5591850) | -              | -                | -                        | +              | +                | stx2b                    | -              | -                | susceptible                                            |
| 15-04722   | nt                 | nm                | 89                  | 9                  | 10    | ERS3396066 (SAMEA5591851) | -              | -                | -                        | +              | +                | stx2e                    | -              | -                | susceptible                                            |
| 15-04750   | 8                  | 28                | 8                   | 28                 | 162   | ERS3396067 (SAMEA5591852) | -              | -                | -                        | +              | +                | stx2e                    | -              | -                | OTE; STR;                                              |
| 15-04756   | 17                 | 18                | 17                  | 18                 | 69    | ERS3396068 (SAMEA5591853) | -              | -                | -                        | +              | +                | stx2a                    | -              | -                | susceptible                                            |
| 15-04760   | nt                 | nt                | 89                  | 9                  | 10    | ERS3396069 (SAMEA5591854) | -              | -                | -                        | +              | +                | stx2e                    | -              | -                | susceptible                                            |
| 15-04762   | 110                | 31                | 110                 | 31                 | 812   | ERS3396070 (SAMEA5591855) | -              | -                | -                        | +              | +                | stx2b                    | -              | -                | susceptible                                            |
| 15-04827-1 | nt                 | 30                | 27                  | 30                 | 753   | ERS3396071 (SAMEA5591856) | -              | -                | -                        | +              | +                | stx2b                    | -              | -                | susceptible                                            |
| 16-00119   | 76                 | 19                | 76                  | 19                 | 675   | ERS3396072 (SAMEA5591857) | +              | +                | stx1c                    | +              | +                | stx2b                    | -              | -                | susceptible                                            |
| 16-00120   | 113                | 4                 | 113                 | 4                  | 10    | ERS3396073 (SAMEA5591858) | +              | +                | stx1c                    | +              | +                | stx2b                    | -              | -                | susceptible                                            |
| 16-00135   | 113                | 4                 | 113                 | 4                  | 10    | ERS3396074 (SAMEA5591859) | +              | +                | stx1c                    | +              | +                | stx2b                    | -              | -                | susceptible                                            |
| 16-00137   | 103                | 2                 | 103                 | 2                  | 17    | ERS3396075 (SAMEA5591860) | +              | +                | stx1a                    | -              | -                | -                        | +              | +                | SXT;                                                   |
| 16-00141   | 113                | 4                 | 113                 | 4                  | 10    | ERS3396076 (SAMEA5591861) | +              | +                | stx1c                    | +              | +                | stx2b                    | -              | -                | susceptible                                            |
| 16-00143   | 76                 | 19                | 76                  | 19                 | 675   | ERS3396077 (SAMEA5591862) | +              | +                | stx1c                    | +              | +                | stx2b                    | -              | -                | susceptible                                            |
| 16-00144   | 128                | 2                 | 128                 | 2                  | 25    | ERS3396078 (SAMEA5591863) | +              | +                | stx1c                    | +              | +                | stx2b                    | -              | -                | susceptible                                            |
| 16-00259   | 145                | nm                | 145                 | 28                 | 32    | ERS3396079 (SAMEA5591864) | -              | -                | -                        | +              | +                | stx2a                    | +              | +                | AMP; CTM; CTX; GEN; MEZ; STR;                          |
| 16-00328   | nt                 | 2                 | 43                  | 2                  | 937   | ERS3396080 (SAMEA5591865) | +              | +                | stx1c                    | -              | -                | -                        | -              | -                | CMP; NAL;                                              |
| 16-00550   | 183                | 18                | 183                 | 18                 | 657   | ERS3396081 (SAMEA5591866) | +              | +                | stx1a                    | +              | +                | stx2a                    | -              | -                | susceptible                                            |
| 16-00581   | rauh               | 2                 | 128                 | 2                  | 25    | ERS3396082 (SAMEA5591867) | -              | -                | -                        | +              | +                | stx2b                    | -              | -                | susceptible                                            |
| 16-00596   | 104                | 7                 | 104                 | 7                  | 1817  | ERS3396083 (SAMEA5591868) | +              | +                | stx1c                    | -              | -                | -                        | -              | -                | AMP; CMP;                                              |
| 16-00635   | 178                | 7                 | 153/178             | 7                  | 278   | ERS3396084 (SAMEA5591869) | +              | +                | stx1c                    | +              | +                | stx2b                    | -              | -                | susceptible                                            |
| 16-00636   | 130                | 11                | 130                 | 11                 | 297   | ERS3396085 (SAMEA5591870) | +              | +                | stx1a                    | +              | +                | stx2a                    | -              | -                | AMP; CMP; CTM; CTX; MEZ; MSU;                          |

|          |      |    |          |    |      |                           |   |   |       |   |   |       |   |   |                                                             |
|----------|------|----|----------|----|------|---------------------------|---|---|-------|---|---|-------|---|---|-------------------------------------------------------------|
| 16-00704 | nt   | nm | 9        | 4  | 46   | ERS3396086 (SAMEA5591871) | - | - | -     | + | + | stx2e | - | - | susceptible                                                 |
| 16-00707 | nt   | 19 | 8        | 19 | 360  | ERS3396087 (SAMEA5591872) | - | - | -     | + | + | stx2e | - | - | CMP;                                                        |
| 16-00712 | 23   | 31 | 23       | 31 | 101  | ERS3396088 (SAMEA5591873) | + | + | stx1a | - | - | -     | - | - | AMP; KAN; MEZ; OTE; STR;                                    |
| 16-00714 | 76   | 19 | 76       | 19 | 675  | ERS3396089 (SAMEA5591874) | + | + | stx1c | - | - | -     | - | - | CMP;                                                        |
| 16-00717 | 82   | nm | 82       | 4  | 10   | ERS3396090 (SAMEA5591875) | - | - | -     | + | + | stx2d | - | - | susceptible                                                 |
| 16-00718 | 128  | 2  | 128      | 2  | 25   | ERS3396091 (SAMEA5591876) | - | - | -     | + | + | stx2b | - | - | AMP; CMP; MEZ; OTE;                                         |
| 16-00910 | 182  | nm | 182      | 25 | 300  | ERS3396092 (SAMEA5591877) | + | + | stx1a | - | - | -     | + | + | CMP;                                                        |
| 16-00980 | 63   | 6  | 63       | 6  | 583  | ERS3396093 (SAMEA5591878) | - | - | -     | + | + | stx2f | + | + | susceptible                                                 |
| 16-01162 | nt   | 21 | OX18     | 21 | 40   | ERS3396094 (SAMEA5591879) | + | + | stx1c | - | - | -     | - | - | susceptible                                                 |
| 16-01173 | 183  | 18 | 183      | 18 | 657  | ERS3396095 (SAMEA5591880) | + | + | stx1a | - | - | -     | - | - | susceptible                                                 |
| 16-01174 | nt   | 49 | OgN-RK11 | 49 | ?    | ERS3396096 (SAMEA5591881) | - | - | -     | + | + | stx2b | - | - | susceptible                                                 |
| 16-01175 | nt   | 30 | 27       | 30 | 753  | ERS3396097 (SAMEA5591882) | - | - | -     | + | + | stx2b | - | - | susceptible                                                 |
| 16-01215 | 8    | 19 | 8        | 19 | 88   | ERS3396098 (SAMEA5591883) | - | - | -     | + | + | stx2e | - | - | CMP;                                                        |
| 16-01258 | nt   | 32 | OgN12    | 32 | 10   | ERS3396099 (SAMEA5591884) | + | + | stx1a | - | - | -     | - | - | NAL;                                                        |
| 16-01365 | 8    | 19 | 8        | 19 | 201  | ERS3396100 (SAMEA5591885) | - | - | -     | + | + | stx2e | - | - | susceptible                                                 |
| 16-01492 | 181  | nm | 181      | 16 | 6274 | ERS3396101 (SAMEA5591886) | + | + | stx1c | + | + | stx2b | - | - | susceptible                                                 |
| 16-01499 | 181  | 49 | 181      | 49 | 173  | ERS3396102 (SAMEA5591887) | + | + | stx1a | + | + | stx2c | - | - | susceptible                                                 |
| 16-01506 | 91   | 19 | 91       | 14 | 33   | ERS3396103 (SAMEA5591888) | + | + | stx1a | - | - | -     | - | - | susceptible                                                 |
| 16-01573 | nt   | 8  | OgN1     | 8  | 26   | ERS3396104 (SAMEA5591889) | - | - | -     | + | + | stx2b | - | - | susceptible                                                 |
| 16-01717 | 57   | 8  | OgN1     | 8  | 26   | ERS3396105 (SAMEA5591890) | - | - | -     | + | + | stx2b | - | - | susceptible                                                 |
| 16-01791 | 43   | 2  | 43       | 2  | 937  | ERS3396106 (SAMEA5591891) | + | + | stx1c | - | - | -     | - | - | susceptible                                                 |
| 16-01865 | 57   | 6  | 2        | 6  | 141  | ERS3396107 (SAMEA5591892) | - | - | -     | + | + | stx2b | - | - | susceptible                                                 |
| 16-01921 | nt   | nm | 100      | 30 | 993  | ERS3396108 (SAMEA5591893) | - | - | -     | + | + | stx2e | - | - | AMP; MEZ; OTE; SXT; STR;                                    |
| 16-02258 | nt   | nm | OgN-RK12 | 16 | 336  | ERS3396109 (SAMEA5591894) | + | + | stx1c | - | - | -     | - | - | susceptible                                                 |
| 16-02291 | nt   | nm | 100      | 20 | 2514 | ERS3396110 (SAMEA5591895) | - | - | -     | + | + | stx2e | - | - | susceptible                                                 |
| 16-02352 | 127  | nt | 127      | 40 | 10   | ERS3396111 (SAMEA5591896) | + | + | stx1a | - | - | -     | + | + | AMP; CMP; CTM; CTX; GEN; KAN; MEZ; MSU; OTE; SXT; STR; NAL; |
| 16-02355 | 84   | nm | 84       | 2  | 306  | ERS3396112 (SAMEA5591897) | + | + | stx1a | - | - | -     | + | + | susceptible                                                 |
| 16-02409 | 157  | nm | 157      | 7  | 11   | ERS3396113 (SAMEA5591898) | - | - | -     | + | + | stx2a | + | + | susceptible                                                 |
| 16-02727 | nt   | nm | 100      | 20 | 2514 | ERS3396114 (SAMEA5591899) | - | - | -     | + | + | stx2e | - | - | susceptible                                                 |
| 16-02921 | nt   | nt | 8        | 9  | 767  | ERS3396115 (SAMEA5591900) | - | - | -     | + | + | stx2e | - | - | AMP; CMP; MEZ; OTE; SXT;                                    |
| 16-02972 | 132  | 34 | 132      | 34 | 582  | ERS3396116 (SAMEA5591901) | - | - | -     | + | + | stx2f | + | + | susceptible                                                 |
| 16-02991 | 110  | 31 | 110      | 31 | 812  | ERS3396117 (SAMEA5591902) | - | - | -     | + | + | stx2b | - | - | susceptible                                                 |
| 16-03025 | 80   | 2  | 80       | 2  | 301  | ERS3396118 (SAMEA5591903) | - | - | -     | + | + | stx2a | + | + | AMP; CMP; KAN; MEZ; MSU; OTE; SXT; STR; NAL;                |
| 16-03031 | nt   | nm | 100      | 20 | 2514 | ERS3396119 (SAMEA5591904) | - | - | -     | + | + | stx2e | - | - | susceptible                                                 |
| 16-03103 | rauh | 7  | 153/178  | 7  | 278  | ERS3396120 (SAMEA5591905) | + | + | stx1c | + | + | stx2b | - | - | AMP;                                                        |
| 16-03160 | 132  | 34 | 132      | 34 | 582  | ERS3396121 (SAMEA5591906) | - | - | -     | + | + | stx2f | + | + | susceptible                                                 |
| 16-03326 | 80   | 2  | 80       | 2  | 301  | ERS3396122 (SAMEA5591907) | - | - | -     | + | + | stx2a | + | + | AMP; CMP; GEN; KAN; OTE; SXT; STR; NAL;                     |
| 16-03329 | nt   | 45 | 12       | 45 | ?    | ERS3396123 (SAMEA5591908) | + | + | stx1d | - | - | -     | - | - | AMP;                                                        |
| 16-03344 | 80   | 2  | 80       | 2  | 301  | ERS3396124 (SAMEA5591909) | - | - | -     | + | + | stx2a | + | + | AMP; CMP; CTM; CTX; GEN; KAN; MEZ; MSU; OTE; SXT; STR; NAL; |
| 16-03345 | 8    | 9  | 8        | 9  | 23   | ERS3396125 (SAMEA5591910) | - | - | -     | + | + | stx2e | - | - | AMP; CMP;                                                   |
| 16-03404 | 145  | nm | 145      | 28 | 32   | ERS3396126 (SAMEA5591911) | - | - | -     | + | + | stx2a | + | + | susceptible                                                 |
| 16-03481 | 43   | 2  | 43       | 2  | 937  | ERS3396127 (SAMEA5591912) | + | + | stx1c | - | - | -     | - | - | AMP; NAL;                                                   |
| 16-03485 | nt   | nm | 8        | 19 | 88   | ERS3396128 (SAMEA5591913) | - | - | -     | + | + | stx2e | - | - | AMP; MEZ; SXT; STR;                                         |
| 16-03565 | 26   | 11 | 26       | 11 | 21   | ERS3396129 (SAMEA5591914) | + | + | stx1a | + | + | stx2a | + | + | susceptible                                                 |
| 16-03669 | nt   | nm | 27       | 30 | 753  | ERS3396130 (SAMEA5591915) | - | - | -     | + | + | stx2b | - | - | susceptible                                                 |
| 16-03680 | 8    | 28 | 8        | 28 | 4496 | ERS3396131 (SAMEA5591916) | - | - | -     | + | + | stx2a | - | - | susceptible                                                 |
| 16-03686 | 55   | 7  | 55       | 9  | 301  | ERS3396132 (SAMEA5591917) | - | - | -     | + | + | stx2d | + | + | AMP; CMP; GEN; KAN; MEZ; OTE; SXT; STR; NAL;                |
| 16-03690 | 80   | 2  | 80       | 2  | 301  | ERS3396133 (SAMEA5591918) | - | - | -     | + | + | stx2a | + | + | CMP; GEN; KAN; OTE; SXT; STR; NAL;                          |
| 16-03709 | 157  | 7  | 157      | 7  | 11   | ERS3396134 (SAMEA5591919) | - | - | -     | + | + | stx2a | + | + | susceptible                                                 |
| 16-03758 | 145  | nm | 145      | 28 | 32   | ERS3396135 (SAMEA5591920) | - | - | -     | + | + | stx2a | + | + | susceptible                                                 |
| 16-03919 | 157  | 7  | 157      | 7  | 11   | ERS3396136 (SAMEA5591921) | - | - | -     | + | + | stx2a | + | + | susceptible                                                 |

|            |      |    |          |       |      |                           |   |   |       |   |   |       |   |   |                                                   |
|------------|------|----|----------|-------|------|---------------------------|---|---|-------|---|---|-------|---|---|---------------------------------------------------|
| 16-03986   | 182  | 25 | 182      | 25    | 300  | ERS3396137 (SAMEA5591922) | + | + | stx1a | - | - | -     | + | + | susceptible                                       |
| 16-04050   | 125  | 6  | 125      | 6     | 583  | ERS3396138 (SAMEA5591923) | - | - | -     | + | + | stx2f | + | + | susceptible                                       |
| 16-04102   | 43   | 2  | 43       | 2     | 937  | ERS3396139 (SAMEA5591924) | + | + | stx1c | + | + | stx2b | - | - | NAL;                                              |
| 16-04112   | 106  | 18 | 106      | 18    | 663  | ERS3396140 (SAMEA5591925) | - | - | -     | + | + | stx2d | - | - | susceptible                                       |
| 16-04141   | nt   | 6  | 2        | 6     | 141  | ERS3396141 (SAMEA5591926) | - | - | -     | + | + | stx2b | - | - | susceptible                                       |
| 16-04147   | rauh | nm | 153/178  | 7     | 4975 | ERS3396142 (SAMEA5591927) | + | + | stx1c | + | + | stx2b | - | - | susceptible                                       |
| 16-04148   | 169  | 21 | 81       | 21    | 737  | ERS3396143 (SAMEA5591928) | + | + | stx1c | + | + | stx2b | - | - | susceptible                                       |
| 16-04178   | 54   | 21 | OgN-RKI3 | 21    | 155  | ERS3396144 (SAMEA5591929) | - | - | -     | + | + | stx2a | - | - | OTE; STR;                                         |
| 16-04225   | 38   | 26 | 38       | 26    | 10   | ERS3396145 (SAMEA5591930) | + | + | stx1c | + | + | stx2b | - | - | OTE; STR;                                         |
| 16-04226   | 38   | 26 | 38       | 26    | 10   | ERS3396146 (SAMEA5591931) | + | + | stx1c | + | + | stx2b | - | - | OTE; STR;                                         |
| 16-04233   | 166  | 28 | 166      | 28    | 1819 | ERS3396147 (SAMEA5591932) | - | - | -     | + | + | stx2b | - | - | susceptible                                       |
| 16-04280   | 2    | 6  | 2        | 6     | 141  | ERS3396148 (SAMEA5591933) | - | - | -     | + | + | stx2b | - | - | susceptible                                       |
| 16-04388   | 109  | 21 | 109      | 21    | 40   | ERS3396149 (SAMEA5591934) | - | - | -     | + | + | stx2f | + | + | susceptible                                       |
| 16-04414   | rauh | nm | 166      | 28    | 1819 | ERS3396150 (SAMEA5591935) | + | + | stx1c | - | - | -     | - | - | susceptible                                       |
| 16-04417   | 183  | 18 | 183      | 18    | 657  | ERS3396151 (SAMEA5591936) | + | + | stx1a | + | + | stx2d | - | - | susceptible                                       |
| 16-04503   | 80   | 2  | 80       | 2     | 301  | ERS3396152 (SAMEA5591937) | - | - | -     | + | + | stx2d | + | + | AMP; CMP; KAN; MEZ; OTE; SXT; STR; NAL;           |
| 16-04698   | nt   | 2  | 112      | 2     | 388  | ERS3396153 (SAMEA5591938) | + | + | stx1c | - | - | -     | - | - | susceptible                                       |
| 16-04798   | nt   | 40 | 168      | 8, 40 | 718  | ERS3396154 (SAMEA5591939) | - | - | -     | + | + | stx2a | - | - | OTE; STR;                                         |
| 16-04840   | nt   | 40 | OgN1     | 8, 40 | 26   | ERS3396155 (SAMEA5591940) | - | - | -     | + | + | stx2b | - | - | susceptible                                       |
| 16-04846   | nt   | nt | OgN-RKI1 | 20    | 6060 | ERS3396156 (SAMEA5591941) | + | + | stx1c | - | - | -     | - | - | susceptible                                       |
| 16-04847   | 80   | 2  | 80       | 2     | 301  | ERS3396157 (SAMEA5591942) | - | - | -     | + | + | stx2a | + | + | AMP; CMP; KAN; MEZ; OTE; SXT; STR; NAL;           |
| 16-04865   | nt   | nt | 27       | 30    | 753  | ERS3396158 (SAMEA5591943) | - | - | -     | + | + | stx2b | - | - | susceptible                                       |
| 16-04944   | rauh | nm | 3        | 12    | 329  | ERS3396159 (SAMEA5591944) | + | + | stx1a | - | - | -     | - | - | susceptible                                       |
| 16-04982   | 165  | nm | 165      | 25    | 119  | ERS3396160 (SAMEA5591945) | + | + | stx1a | + | + | stx2a | + | + | susceptible                                       |
| 16-05089   | rauh | 2  | 43       | 2     | 937  | ERS3396161 (SAMEA5591946) | + | + | stx1c | - | - | -     | - | - | susceptible                                       |
| 16-05108   | nt   | 31 | 110      | 31    | 812  | ERS3396162 (SAMEA5591947) | - | - | -     | + | + | stx2b | - | - | susceptible                                       |
| 16-05138   | nt   | nm | 183      | 18    | 657  | ERS3396163 (SAMEA5591948) | + | + | stx1a | + | + | stx2a | - | - | susceptible                                       |
| 16-05184   | nt   | 20 | OgN10    | 20    | 691  | ERS3396164 (SAMEA5591949) | + | + | stx1a | - | - | -     | - | - | susceptible                                       |
| 16-05299   | nt   | nm | 86       | 51    | 155  | ERS3396165 (SAMEA5591950) | + | + | stx1a | - | - | -     | - | - | AMP; CIP; CMP; CTM; CTX; MEZ; MSU; OTE; STR; NAL; |
| 16-05329   | nt   | 2  | 112      | 2     | 388  | ERS3396166 (SAMEA5591951) | + | + | stx1c | - | - | -     | - | - | AMP;                                              |
| 16-05332   | rauh | 16 | 181      | 16    | 6274 | ERS3396167 (SAMEA5591952) | + | + | stx1c | - | - | -     | - | - | susceptible                                       |
| 16-05416   | nt   | nm | 100      | 20    | 2514 | ERS3396168 (SAMEA5591953) | - | - | -     | + | + | stx2e | - | - | AMP; MEZ; OTE; STR;                               |
| 17-00140-1 | 157  | nm | 157      | 7     | 11   | ERS3396169 (SAMEA5591954) | + | + | stx1a | - | - | -     | + | + | susceptible                                       |
| 17-00242   | 36   | 19 | 36       | 19    | 10   | ERS3396170 (SAMEA5591955) | - | - | -     | + | + | stx2e | - | - | susceptible                                       |
| 17-00261   | 157  | 7  | 157      | 7     | 11   | ERS3396171 (SAMEA5591956) | + | + | stx1a | + | + | stx2a | + | + | susceptible                                       |
| 17-00285   | 26   | 11 | 26       | 11    | 29   | ERS3396172 (SAMEA5591957) | - | - | -     | + | + | stx2a | + | + | AMP; MEZ; STR;                                    |
| 17-00402   | 36   | 14 | 36       | 14    | 1176 | ERS3396173 (SAMEA5591958) | - | - | -     | + | + | stx2e | - | - | susceptible                                       |
| 17-00411   | 36   | nm | 36       | 14    | 1176 | ERS3396174 (SAMEA5591959) | - | - | -     | + | + | stx2g | - | - | susceptible                                       |
| 17-00416   | rauh | nm | 181      | 16    | 6274 | ERS3396175 (SAMEA5591960) | + | + | stx1c | + | + | stx2b | - | - | susceptible                                       |
| 17-00475   | 156  | 25 | 156      | 25    | 300  | ERS3396176 (SAMEA5591961) | - | - | -     | + | + | stx2a | + | + | susceptible                                       |
| 17-00641   | nt   | 25 | 177      | 25    | 659  | ERS3396177 (SAMEA5591962) | - | - | -     | + | + | stx2c | + | + | OTE; STR;                                         |
| 17-00703   | 81   | 21 | 81       | 21    | 737  | ERS3396178 (SAMEA5591963) | + | + | stx1c | - | - | -     | - | - | AMP; MEZ; STR;                                    |
| 17-00772   | 157  | nm | 157      | 7     | 11   | ERS3396179 (SAMEA5591964) | - | - | -     | + | + | stx2a | + | + | susceptible                                       |
| 17-00778   | 91   | 14 | 91       | 14    | 33   | ERS3396180 (SAMEA5591965) | + | + | stx1a | + | + | stx2b | - | - | CMP;                                              |
| 17-00844   | 186  | 10 | 123/186  | 10    | 3695 | ERS3396181 (SAMEA5591966) | + | + | stx1c | + | + | stx2b | - | - | susceptible                                       |
| 17-00847   | 104  | 21 | 104      | 21    | 672  | ERS3396182 (SAMEA5591967) | + | + | stx1a | + | + | stx2d | - | - | susceptible                                       |
| 17-00856   | 157  | nm | 157      | 7     | 11   | ERS3396183 (SAMEA5591968) | + | + | stx1a | + | + | stx2a | + | + | susceptible                                       |
| 17-00882   | 157  | nm | 157      | 7     | 11   | ERS3396184 (SAMEA5591969) | + | + | stx1a | + | + | stx2c | + | + | susceptible                                       |
| 17-00884   | 157  | 7  | 157      | 7     | 11   | ERS3396185 (SAMEA5591970) | - | - | -     | + | + | stx2a | + | + | susceptible                                       |
| 17-00946   | 103  | 2  | 103      | 2     | 17   | ERS3396186 (SAMEA5591971) | + | + | stx1a | - | - | -     | + | + | susceptible                                       |
| 17-00991   | 103  | 2  | 103      | 2     | 17   | ERS3396187 (SAMEA5591972) | + | + | stx1a | - | - | -     | + | + | susceptible                                       |

|          |      |    |       |    |      |                           |   |   |       |   |   |       |   |   |                                         |
|----------|------|----|-------|----|------|---------------------------|---|---|-------|---|---|-------|---|---|-----------------------------------------|
| 17-00995 | 36   | 14 | 36    | 14 | 1176 | ERS3396188 (SAMEA5591973) | - | - | -     | + | + | stx2g | - | - | susceptible                             |
| 17-00997 | 36   | 19 | 36    | 19 | 10   | ERS3396189 (SAMEA5591974) | - | - | -     | + | + | stx2g | - | - | susceptible                             |
| 17-00998 | 36   | 14 | 36    | 14 | 1176 | ERS3396190 (SAMEA5591975) | - | - | -     | + | + | stx2g | - | - | susceptible                             |
| 17-01000 | 36   | 14 | 36    | 14 | 1176 | ERS3396191 (SAMEA5591976) | - | - | -     | + | + | stx2g | - | - | CMP;                                    |
| 17-01045 | 157  | nm | 157   | 7  | 11   | ERS3396192 (SAMEA5591977) | + | + | stx1a | + | + | stx2c | + | + | AMP; MEZ; STR;                          |
| 17-01061 | 26   | 11 | 26    | 11 | 21   | ERS3396193 (SAMEA5591978) | - | - | -     | + | + | stx2a | + | + | AMP; MEZ;                               |
| 17-01142 | 157  | nm | 157   | 7  | 11   | ERS3396194 (SAMEA5591979) | + | + | stx1a | + | + | stx2c | + | + | STR;                                    |
| 17-01185 | 177  | nm | 177   | 25 | 659  | ERS3396195 (SAMEA5591980) | - | - | -     | + | + | stx2c | + | + | susceptible                             |
| 17-01359 | 157  | 7  | 157   | 7  | 11   | ERS3396196 (SAMEA5591981) | - | - | -     | + | + | stx2c | + | + | susceptible                             |
| 17-01749 | 103  | 2  | 103   | 2  | 17   | ERS3396197 (SAMEA5591982) | + | + | stx1a | - | - | -     | + | + | susceptible                             |
| 17-01774 | 104  | nm | 104   | 21 | 672  | ERS3396198 (SAMEA5591983) | + | + | stx1a | + | + | stx2a | - | - | susceptible                             |
| 17-01864 | 157  | 7  | 157   | 7  | 11   | ERS3396199 (SAMEA5591984) | - | - | -     | + | + | stx2a | + | + | susceptible                             |
| 17-01972 | 157  | nm | 157   | 7  | 587  | ERS3396200 (SAMEA5591985) | - | - | -     | + | + | stx2a | + | + | susceptible                             |
| 17-01975 | 145  | 28 | 145   | 28 | 32   | ERS3396201 (SAMEA5591986) | - | - | -     | + | + | stx2a | + | + | susceptible                             |
| 17-02088 | 157  | nm | 157   | 7  | 1804 | ERS3396202 (SAMEA5591987) | - | - | -     | + | + | stx2c | + | + | susceptible                             |
| 17-02233 | 157  | 7  | 157   | 7  | 11   | ERS3396203 (SAMEA5591988) | + | + | stx1a | + | + | stx2a | + | + | CMP;                                    |
| 17-02566 | 157  | 7  | 157   | 7  | 11   | ERS3396204 (SAMEA5591989) | - | - | -     | + | + | stx2c | + | + | susceptible                             |
| 17-02598 | 157  | nm | 157   | 7  | 11   | ERS3396205 (SAMEA5591990) | - | - | -     | + | + | stx2a | + | + | susceptible                             |
| 17-02628 | 157  | 7  | 157   | 7  | 11   | ERS3396206 (SAMEA5591991) | - | - | -     | + | + | stx2a | + | + | susceptible                             |
| 17-02676 | 157  | 7  | 157   | 7  | 11   | ERS3396207 (SAMEA5591992) | + | + | stx1a | + | + | stx2c | + | + | AMP; CMP; GEN; MEZ; OTE; SXT; STR; NAL; |
| 17-02726 | 157  | 7  | 157   | 7  | 11   | ERS3396208 (SAMEA5591993) | + | + | stx1a | + | + | stx2c | + | + | susceptible                             |
| 17-02778 | 157  | 7  | 157   | 7  | 11   | ERS3396209 (SAMEA5591994) | - | - | -     | + | + | stx2a | + | + | susceptible                             |
| 17-02862 | 157  | 7  | 157   | 7  | 11   | ERS3396210 (SAMEA5591995) | - | - | -     | + | + | stx2c | + | + | susceptible                             |
| 17-02938 | 157  | 7  | 157   | 7  | 11   | ERS3396211 (SAMEA5591996) | + | + | stx1a | + | + | stx2c | + | + | susceptible                             |
| 17-03030 | nt   | 21 | 174   | 21 | 677  | ERS3396212 (SAMEA5591997) | - | - | -     | + | + | stx2d | - | - | susceptible                             |
| 17-03136 | 55   | 7  | 55    | 7  | 335  | ERS3396213 (SAMEA5591998) | - | - | -     | + | + | stx2a | + | + | SXT; STR;                               |
| 17-03548 | 103  | 2  | 103   | 2  | 17   | ERS3396214 (SAMEA5591999) | + | + | stx1a | - | - | -     | + | + | susceptible                             |
| 17-03780 | 157  | 7  | 157   | 7  | 11   | ERS3396215 (SAMEA5592000) | - | - | -     | + | + | stx2c | + | + | susceptible                             |
| 17-03836 | 157  | 7  | 157   | 7  | 11   | ERS3396216 (SAMEA5592001) | + | + | stx1a | + | + | stx2c | + | + | susceptible                             |
| 17-03846 | 157  | 7  | 157   | 7  | 11   | ERS3396217 (SAMEA5592002) | + | + | stx1a | + | + | stx2a | + | + | susceptible                             |
| 17-03961 | 157  | 7  | 157   | 7  | 11   | ERS3396218 (SAMEA5592003) | - | - | -     | + | + | stx2c | + | + | susceptible                             |
| 17-03963 | 157  | 7  | 157   | 7  | 11   | ERS3396219 (SAMEA5592004) | + | + | stx1a | + | + | stx2a | + | + | susceptible                             |
| 17-03964 | 157  | 7  | 157   | 7  | 11   | ERS3396220 (SAMEA5592005) | - | - | -     | + | + | stx2c | + | + | susceptible                             |
| 17-04023 | 157  | 7  | 157   | 7  | 11   | ERS3396221 (SAMEA5592006) | - | - | -     | + | + | stx2a | + | + | susceptible                             |
| 17-04111 | 157  | 7  | 157   | 7  | 11   | ERS3396222 (SAMEA5592007) | + | + | stx1a | - | + | stx2c | + | + | susceptible                             |
| 17-04143 | 157  | 7  | 157   | 7  | 11   | ERS3396223 (SAMEA5592008) | + | + | stx1a | + | + | stx2c | + | + | susceptible                             |
| 17-04868 | 157  | 7  | 157   | 7  | 11   | ERS3396224 (SAMEA5592009) | + | + | stx1a | + | + | stx2c | + | + | susceptible                             |
| 17-04959 | 157  | 7  | 157   | 7  | 11   | ERS3396225 (SAMEA5592010) | + | + | stx1a | + | + | stx2a | + | + | susceptible                             |
| 17-05089 | 157  | 7  | 157   | 7  | 11   | ERS3396226 (SAMEA5592011) | - | - | -     | + | + | stx2a | + | + | susceptible                             |
| 17-05090 | 103  | 11 | 103   | 11 | 723  | ERS3396227 (SAMEA5592012) | + | + | stx1a | - | - | -     | + | + | AMP; CTM; CTX; MEZ; MSU; OTE; SXT; STR; |
| 17-05135 | nt   | 2  | OX18  | 2  | 4017 | ERS3396228 (SAMEA5592013) | + | + | stx1a | + | + | stx2a | - | - | susceptible                             |
| 17-05203 | rauh | 16 | 87    | 16 | 2101 | ERS3396229 (SAMEA5592014) | - | - | -     | + | + | stx2b | - | - | susceptible                             |
| 17-05261 | nt   | nm | 141   | 19 | 8237 | ERS3396230 (SAMEA5592015) | - | - | -     | + | + | stx2e | - | - | susceptible                             |
| 17-05292 | nt   | 36 | 7     | 31 | 446  | ERS3396231 (SAMEA5592016) | + | + | stx1c | - | - | -     | - | - | susceptible                             |
| 17-05333 | 181  | 16 | 181   | 16 | 6274 | ERS3396232 (SAMEA5592017) | + | + | stx1c | + | + | stx2b | - | - | susceptible                             |
| 17-05371 | 43   | 2  | 43    | 2  | 937  | ERS3396233 (SAMEA5592018) | + | + | stx1c | - | - | -     | - | - | susceptible                             |
| 17-05374 | 157  | 7  | 157   | 7  | 11   | ERS3396234 (SAMEA5592019) | - | - | -     | + | + | stx2a | + | + | susceptible                             |
| 17-05375 | nt   | 49 | OgN31 | 49 | 2520 | ERS3396235 (SAMEA5592020) | - | - | -     | + | + | stx2a | - | - | susceptible                             |
| 17-05381 | 113  | 21 | 113   | 21 | 223  | ERS3396236 (SAMEA5592021) | - | - | -     | + | + | stx2a | - | - | susceptible                             |
| 17-05419 | 157  | 7  | 157   | 7  | 11   | ERS3396237 (SAMEA5592022) | + | + | stx1a | + | + | stx2c | + | + | susceptible                             |
| 17-05433 | 157  | 7  | 157   | 7  | 11   | ERS3396238 (SAMEA5592023) | + | + | stx1a | + | + | stx2c | + | + | susceptible                             |

|          |      |    |          |    |      |                           |   |   |       |   |   |       |   |   |                                              |
|----------|------|----|----------|----|------|---------------------------|---|---|-------|---|---|-------|---|---|----------------------------------------------|
| 17-05493 | nt   | 30 | 27       | 30 | 753  | ERS3396239 (SAMEA5592024) | - | - | -     | + | + | stx2b | - | - | susceptible                                  |
| 17-05504 | nt   | 52 | 187      | 52 | 642  | ERS3396240 (SAMEA5592025) | + | + | stx1c | - | - | -     | - | - | AMP; COX;                                    |
| 17-05507 | 109  | 25 | 182      | 25 | 300  | ERS3396241 (SAMEA5592026) | + | + | stx1a | - | - | -     | + | + | susceptible                                  |
| 17-05609 | nt   | nm | 100      | 30 | 993  | ERS3396242 (SAMEA5592027) | - | - | -     | + | + | stx2e | - | - | OTE;                                         |
| 17-05662 | 63   | 6  | 63       | 6  | 583  | ERS3396243 (SAMEA5592028) | - | - | -     | + | + | stx2f | + | + | susceptible                                  |
| 17-05663 | nt   | 30 | 27       | 30 | 753  | ERS3396244 (SAMEA5592029) | - | - | -     | + | + | stx2b | - | - | susceptible                                  |
| 17-05667 | nt   | 2  | 80       | 2  | 301  | ERS3396245 (SAMEA5592030) | - | - | -     | + | + | stx2a | + | + | AMP; CMP; GEN; KAN; MEZ; OTE; SXT; STR; NAL; |
| 17-05676 | nt   | 29 | OgN-RK14 | 29 | 515  | ERS3396246 (SAMEA5592031) | - | - | -     | + | + | stx2b | - | - | susceptible                                  |
| 17-05752 | 157  | 7  | 157      | 7  | 11   | ERS3396247 (SAMEA5592032) | - | - | -     | + | + | stx2c | + | + | susceptible                                  |
| 17-05760 | 98   | nm | 98       | 21 | 306  | ERS3396248 (SAMEA5592033) | + | + | stx1a | - | - | -     | + | + | susceptible                                  |
| 17-05763 | 157  | 7  | 157      | 7  | 11   | ERS3396249 (SAMEA5592034) | - | - | -     | + | + | stx2a | + | + | susceptible                                  |
| 17-05810 | nt   | 21 | OX18     | 21 | 40   | ERS3396250 (SAMEA5592035) | + | + | stx1c | - | - | -     | - | - | CMP; NAL;                                    |
| 17-05813 | 110  | 31 | 110      | 31 | 812  | ERS3396251 (SAMEA5592036) | - | - | -     | + | + | stx2b | - | - | susceptible                                  |
| 17-05826 | nt   | 7  | 117      | 7  | 504  | ERS3396252 (SAMEA5592037) | + | + | stx1a | - | - | -     | - | - | AMP;                                         |
| 17-05857 | 63   | 6  | 63       | 6  | 583  | ERS3396253 (SAMEA5592038) | - | - | -     | + | + | stx2f | + | + | susceptible                                  |
| 17-05859 | rauh | 7  | 153/178  | 7  | 278  | ERS3396254 (SAMEA5592039) | + | + | stx1c | + | + | stx2b | - | - | susceptible                                  |
| 17-05861 | nt   | 30 | 100      | 30 | 993  | ERS3396255 (SAMEA5592040) | - | - | -     | + | + | stx2e | - | - | OTE;                                         |
| 17-05863 | nt   | 18 | 15       | 18 | 69   | ERS3396256 (SAMEA5592041) | + | + | stx1a | - | - | -     | - | - | STR;                                         |
| 17-05864 | rauh | 7  | 153/178  | 7  | 4975 | ERS3396257 (SAMEA5592042) | + | + | stx1c | + | + | stx2b | - | - | susceptible                                  |
| 17-05865 | nt   | 8  | 179      | 8  | 297  | ERS3396258 (SAMEA5592043) | - | - | -     | + | + | stx2a | - | - | susceptible                                  |
| 17-05936 | nt   | 16 | OgN-RK12 | 16 | 336  | ERS3396259 (SAMEA5592044) | + | + | stx1c | - | - | -     | - | - | susceptible                                  |
| 17-06065 | 76   | 19 | 76       | 19 | 675  | ERS3396260 (SAMEA5592045) | + | + | stx1c | - | + | stx2b | - | - | CMP;                                         |
| 17-06072 | nt   | 4  | 78       | 4  | 3101 | ERS3396261 (SAMEA5592046) | + | + | stx1c | - | - | -     | - | - | susceptible                                  |
| 17-06075 | nt   | 8  | 174      | 8  | 13   | ERS3396262 (SAMEA5592047) | + | + | stx1c | + | + | stx2b | - | - | susceptible                                  |
| 17-06108 | nt   | 16 | OgN13    | 16 | 295  | ERS3396263 (SAMEA5592048) | + | + | stx1c | - | - | -     | - | - | susceptible                                  |
| 17-06200 | nt   | 4  | 78       | 4  | 3101 | ERS3396264 (SAMEA5592049) | + | + | stx1c | - | - | -     | - | - | susceptible                                  |
| 17-06201 | nt   | 30 | 27       | 30 | 753  | ERS3396265 (SAMEA5592050) | - | - | -     | + | + | stx2b | - | - | susceptible                                  |
| 17-06322 | nt   | 21 | 174      | 21 | 677  | ERS3396266 (SAMEA5592051) | - | - | -     | + | + | stx2d | - | - | susceptible                                  |
| 17-06327 | 63   | 6  | 63       | 6  | 583  | ERS3396267 (SAMEA5592052) | - | - | -     | + | + | stx2f | + | + | susceptible                                  |
| 17-06334 | 156  | 25 | 156      | 25 | 4942 | ERS3396268 (SAMEA5592053) | + | + | stx1a | - | - | -     | + | + | susceptible                                  |
| 17-06335 | 111  | 8  | 111      | 8  | 16   | ERS3396269 (SAMEA5592054) | + | + | stx1a | + | + | stx2a | + | + | CMP; OTE;                                    |
| 17-06351 | nt   | 48 | OgN31    | 48 | 3519 | ERS3396270 (SAMEA5592055) | - | - | -     | + | + | stx2a | - | - | susceptible                                  |
| 17-06369 | 136  | nm | 136      | 20 | 398  | ERS3396271 (SAMEA5592056) | + | + | stx1c | - | - | -     | - | - | susceptible                                  |
| 17-06460 | 7    | 4  | 7        | 4  | 93   | ERS3396272 (SAMEA5592057) | + | - | -     | - | - | -     | - | - | susceptible                                  |
| 17-06523 | 43   | nt | 43       | 2  | 937  | ERS3396273 (SAMEA5592058) | + | + | stx1c | - | - | -     | - | - | susceptible                                  |
| 17-06526 | nt   | 7  | 117      | 7  | 504  | ERS3396274 (SAMEA5592059) | + | + | stx1a | - | - | -     | - | - | AMP; MEZ; OTE; SXT; STR;                     |
| 17-07220 | 8    | 14 | 8        | 14 | 136  | ERS3396275 (SAMEA5592060) | - | - | -     | + | + | stx2b | - | - | susceptible                                  |
| 17-07221 | 8    | 14 | 8        | 14 | 136  | ERS3396276 (SAMEA5592061) | - | - | -     | + | + | stx2b | - | - | susceptible                                  |
| 17-07255 | 103  | 2  | 103      | 2  | 17   | ERS3396277 (SAMEA5592062) | + | + | stx1a | - | - | -     | + | + | susceptible                                  |
| 17-07259 | 8    | 4  | 8        | 4  | ?    | ERS3396278 (SAMEA5592063) | - | - | -     | + | + | stx2e | - | - | susceptible                                  |

Table S2: Reference sequences for O-AGCs downloaded from NCBI. (Lang et al., Whole genome-based public health surveillance of less common STEC serovars and untypable strains identifies four novel O genotypes)

| O-AGC/ virulence marker gene | GenBank No./ Accession No. |
|------------------------------|----------------------------|
| OgN1                         | LC125927.1                 |
| OgN8                         | LC125928.1                 |
| OgN9                         | LC125929.1                 |
| OgN10                        | LC125930.1                 |
| OgN12                        | LC125931.1                 |
| OgN31                        | LC125932.1                 |
| OgN2                         | LC177546.1                 |
| OgN3                         | LC177547.1                 |
| OgN4                         | LC177548.1                 |
| OgN5                         | LC177549.1                 |
| OgN13                        | LC177550.1                 |
| OgN14                        | LC177551.1                 |
| OgN15                        | LC177552.1                 |
| OgN16                        | LC177553.1                 |
| OgN17                        | LC177554.1                 |
| OX18                         | KJ710507.1                 |
| OX21                         | KJ739596.2                 |
| OX38                         | KJ739599.3                 |
| OX10                         | KJ778792.1                 |
| OX6                          | KJ778794.1                 |
| OX9                          | KJ778795.1                 |
| OX13                         | KP710591.1                 |
| OX25                         | KP710594.1                 |
| OX19                         | KP868751.1                 |
| OX28                         | KT207929.1                 |

Tab. S3: Homologues of the new O-AGCs found by NCBI nBLAST (Lang et al., Whole genome-based public health surveillance of less common STEC serovars and untypable strains identifies four novel O genotypes). n.d.=not defined.

| <b>Homologues to new O-AGC OgN-RKI1</b> |           |                  |                         |                   |
|-----------------------------------------|-----------|------------------|-------------------------|-------------------|
| strain                                  | Serotype  | isolation source | nucleotide identity [%] | GenBank Accession |
| <i>S. boydii</i> BS984                  | 19        | human feces      | 98.27                   | PUGO00000000.1    |
| <i>S. boydii</i> 83-578                 | 19        | n.d.             | 98.28                   | CP026814.1        |
| STEC2841                                | Ont:H20   | human feces      | 97.93                   | LOIQ01000034.1    |
| <b>Homologues to new O-AGC OgN-RKI2</b> |           |                  |                         |                   |
| strain                                  | Serotype  | isolation source | nucleotide identity [%] | GenBank Accession |
| <i>E. coli</i> MOD1-3827                | OXY24:H16 | cheese           | 100                     | NZ_NJRY01000017.1 |
| <i>E. coli</i> MOD1-3831                | OXY24:H17 | cheese           | 100                     | NZ_NJRW01000017.1 |
| <i>E. coli</i> UMEA 3176-1              | n.d.      | n.d.             | 99.99                   | AWCA01000017.1    |
| <i>E. coli</i> MOD1-6444                | n.d.      | deer             | 99.96                   | NZ_NOQO01000009.1 |

| <i>E. coli</i> MOD1-6465                | n.d.     | pig serum        | 99.97                   | NZ_NNVR01000001.1 |
|-----------------------------------------|----------|------------------|-------------------------|-------------------|
| <i>E. coli</i> 116 2DZ3                 | n.d.     | dog              | 99.96                   | MOJG01000001.1    |
| <i>E. coli</i> 495 BN4                  | n.d.     | fly              | 99.96                   | NZ_MOHI01000022.1 |
| <i>E. coli</i> B132                     | n.d.     | human feces      | 99.98                   | NZ_NRYW01000024.1 |
| <i>E. coli</i> P7a                      | O20:H-   | n.d.             | 99.98                   | KJ778793.1        |
| <i>E. coli</i> MOD1-5481                | n.d.     | water            | 98.32                   | NZ_NLOH01000004.1 |
| <b>Homologues to new O-AGC OgN-RKI3</b> |          |                  |                         |                   |
| strain                                  | Serotype | isolation source | nucleotide identity [%] | GenBank Accession |
| <i>E. coli</i> 31-678                   | n.d.     | human urine      | 99.98                   | LENM01000002.1    |
| <i>E. coli</i> Lys36 c175               | n.d.     | soil             | 99.98                   | PJRE01000168.1    |
| <i>E. coli</i> Lys45 c120               | n.d.     | soil             | 99.98                   | PJRD01000116.1    |
| <i>E. coli</i> Lys53 c131               | n.d.     | soil             | 99.98                   | PJRB01000125.1    |
| <i>E. coli</i> Lys24 c153               | n.d.     | soil             | 99.98                   | PJRI01000151.1    |
| <i>E. coli</i> Lys28 c153               | n.d.     | soil             | 99.98                   | PJRH01000152.1    |
| <i>E. coli</i> Lys34 c165               | n.d.     | soil             | 99.98                   | PJRG01000163.1    |
| <i>E. coli</i> Lys35 c166               | n.d.     | soil             | 99.98                   | PJRF01000150.1    |
| <i>E. coli</i> Lys52 c132               | n.d.     | soil             | 99.98                   | PJRC01000131.1    |
| <i>E. coli</i> C019                     | O59:H21  | human            | 99.98                   | NWBD01000002.1    |



|                                      |          | feces               |                            |                      |
|--------------------------------------|----------|---------------------|----------------------------|----------------------|
| <i>E. coli</i> C322                  | O59:H21  | human<br>feces      | 99.98                      | NWAU01000002.1       |
| <i>E. coli</i> C323                  | O59:H21  | human<br>feces      | 99.98                      | NWAT01000002.1       |
| <i>E. coli</i> F426                  | Ont:Hnt  | human<br>feces      | 99.98                      | NWAK01000017.1       |
| <i>E. coli</i> T168                  | O59:H21  | human<br>feces      | 99.98                      | NWAB01000006.1       |
| <i>E. coli</i> T297                  | O59:H21  | human<br>feces      | 99.98                      | NVZZ01000007.1       |
| <b>Homologues new O-AGC OgN-RKI4</b> |          |                     |                            |                      |
| strain                               | Serotype | isolation<br>source | nucleotide<br>identity [%] | GenBank<br>Accession |
| <i>E. coli</i> N38833PS              | n.d.     | farm                | 99.99                      | JUBT01000041.1       |
| <i>E. coli</i> YH17162               | n.d.     | chicken             | 99.99                      | PTMY01000002.1       |
| <i>E. coli</i> MOD1-<br>5029         | n.d.     | beef                | 99.97                      | NLUJ01000004.1       |
| <i>E. coli</i> A185                  | n.d.     | human<br>feces      | 99.88                      | NRZN01000085.1       |
| <i>E. coli</i> AVC113                | Ont:H21  | chicken             | 99.87                      | QOGQ01000002.1       |
| <i>E. coli</i> M856                  | Ont:H6   | human<br>feces      | 99.15                      | FBUQ01000014.1       |

|                                  |        |                |       |                |
|----------------------------------|--------|----------------|-------|----------------|
| <i>E. coli</i><br>ERS085421SC    | n.d.   | human<br>feces | 98.6  | CYDG01000036.1 |
| <i>E. coli</i><br>ERS085427SC    | n.d.   | human<br>feces | 98.61 | CYDD01000037.1 |
| <i>E. coli</i> 303139 26         | n.d.   | human<br>feces | 98.51 | JHTB01000026.1 |
| <i>E. coli</i> O2-like O-<br>AGC | O2:H49 | n.d.           | 77.14 | KY115228.1     |
